# Supplementary material
Source: publisher figshare collection journal article supplement (https://gsapubs.figshare.com/ndownloader/files/24140060)
Supplement: Supplementary file 1 [file 24140060]

1    **Supplement to “Anatomy of a crustal-scale accretionary complex: Insights from deep seismic**  
2    **sounding of the onshore western Makran subduction zone, Iran ” by Haberland et al.**  
3    **(G47700)**

5    **EXPERIMENT & DATA EXAMPLES**

6            In September 2017, three 200 km long, north-south trending, crustal-scale, deep seismic  
7    sounding (DSS) profiles have been acquired along 56° E, 59.5° E and 60.75° E (Figure 1 of main  
8    document). Along each profile, 9 to 10 artificial sources (chemical explosions in boreholes) with  
9    charges between 400 and 800 kg of explosives at a borehole depth of about 30 m were shot. Along  
10   each of the sequentially measured profiles, 300 autonomous digital recorders sampling with  
11   100 samples per seconds and equipped with 4.5 Hz vertical geophones were deployed. Thus the  
12   wavefields were densely sampled due to small inter-station distances of around 600 m (see Figure  
13   S1). Built-in GPS secured the accurate timing of the recordings. More information about the  
14   experiment and the data can be found in Haberland et al. (2020).

16   **MARKOV CHAIN MONTE CARLO TRAVEL TIME TOMOGRAPHY**

17            We apply a Bayesian Markov chain Monte Carlo formalism (MCMC) to the inversion of  
18   refraction seismic, travel time data sets to derive 2D velocity models below lines of sources and  
19   seismic receivers (Ryberg & Haberland, 2018). Typical refraction data sets have experimental  
20   geometries which are very poor, highly ill-posed and far from being ideal, and thus structural  
21   resolution quickly degrades with depth. Conventional inversion techniques, based on regularization,  
22   potentially suffer from the choice of inappropriate inversion parameters and only local model space  
23   exploration. Markov chain Monte Carlo techniques (Bodin & Sambridge, 2009, Bodin et al., 2012)  
24   are used for exhaustive sampling of the model space without the need of prior knowledge (or  
25   assumptions) of inversion parameters, resulting in a large number of models fitting the  
26   observations. Statistical analysis of these models allows to derive an average (reference) solution

27 and its standard deviation, thus providing uncertainty estimates of the inversion result. We checked  
28 the results obtained from the MCMC method by also applying a conventional inversion code based  
29 on a regularized inversion (e.g., Zelt & Barton, 1998). Comparison of the models derived by the  
30 two different inversion approaches shows a very good agreement.

31 Input data for the algorithm are the travel times of the Pg and Pn phases (first arrivals) along  
32 each profile, which were manually picked after the data had been bandpass-filtered and  
33 appropriately scaled. In total, 1823, 1921 and 2150 travel time picks could be used for the  
34 calculations for profiles 1, 2 and 3, respectively (Figure S2). The velocity models of the three  
35 profiles are shown in Figure 2 of the main text and Figures S3 to S5. Figure S6 shows the  
36 uncertainties/errors of the models. In order to assess the accuracy of the derived models we  
37 conducted synthetic recovery tests (Figure S7).

38

## 39 **REFLECTION SEISMICS – LINE DRAWING MIGRATION**

40 Given the dense spacing of seismic receivers (~600 m), reflections from crustal and upper  
41 mantle discontinuities could be recorded and identified clearly by their coherent appearance in the  
42 wave field around the critical distances (large amplitude, critical reflections). Due to the relatively  
43 small number of seismic sources along each profile (~10 shot points), classical CMP like data  
44 processing failed to produce an image of the crustal reflectivity. Instead we used the automatic line-  
45 drawing migration approach of Bauer et al., (2013), which significantly enhances the quality and  
46 resolution of the image of the crustal structures. This technique automatically extracts coherent  
47 reflections in individual shot gathers, resulting in a set of line-drawing elements for every shot  
48 gather. These elements are characterized by different attributes: travel time, distance from shot, dip  
49 (slope or apparent velocity), semblance (a coherency measure) and amplitude, but no phase  
50 information is kept. These line-drawing elements are then migrated using the technique of Bauer et  
51 al. (2013) employing the velocity model previously derived by travel time tomography of refracted  
52 phases thus resulting in a consistent picture. Instead of showing the complete set of all migrated

53 line-drawings (several thousands per shot gather), an automatic post-migration selection process has  
54 been applied (Bauer et al., 2013). Only line-drawing elements, for instance, above a given  
55 amplitude and semblance threshold, with specific dips (slopes, apparent velocities), etc. are  
56 selected. This selection significantly reduces the noisy appearance of the migrated shot gathers and  
57 puts emphasis on the sufficiently strong and coherent crustal reflections.

58 Due to the given geometry of sources and receivers, no near-vertical incidence reflections  
59 (e.g. from shallow or mid-crust) are imaged in the line drawing migration approach, only highly  
60 energetic wide-angle reflections from deeper reflectors (e.g. PmP phase) contributed to the image of  
61 crustal reflectivity (Figures 2, S3-S5).

62

### 63 **FIGURE CAPTIONS:**

64 **Figure S1:** Example of a shot record, profile 2, shot 4. Shown are all traces recording the shot  
65 (bandpass-filtered, trace-normalized). Note the direct Pg phase and the prominent PmP wide angle  
66 reflection at around 70 – 120 km / 4-6 s. Red dots indicate the travel times of the first arrivals,  
67 which have been picked and used during the tomographic inversion.

68 **Figure S2:** Overview of all 1921 travel time readings (picks of first P-wave arrivals) along  
69 profile 2. This dataset forms the input for the tomographic inversion of profile 2.

70 **Figure S3:** Results along profile 1. The top panel shows the tomographic Vp model, the lower panel  
71 shows the migrated line drawings (line segments) overlaid on the faded Vp model. For additional  
72 details see caption of Figure 2 of main document. The crustal structure along profile 1 seems to be  
73 more complex than along profiles 2 and 3 (Figure 2 of main document; Figures S4 and S5), with  
74 more lateral alternations of lower and higher velocities. We notice a broad region of moderate  
75 velocities along profile 1 beneath the Inner Makran unit which is much wider at this longitude (see  
76 Figure 1 of main document). In addition we also notice an anomaly of higher velocities (“D”)  
77 laterally sandwiched between lower-velocity regions (“C”) along profile 1. However, here anomaly  
78 “D” is not beneath the Outer Makran unit but shifted to the south. Thus, while the anomalies “C”

79 and “D” along profiles 2 and 3 roughly coincide with tectono-stratigraphic units mapped at the  
80 surface, on profile 1 this association is not as obvious.

81 **Figure S4:** Results along profile 2. For details see captions of Figure 2 of main text and Figure S3.

82 **Figure S5:** Results along profile 3. For details see captions of Figure 2 of main text and Figure S3.

83 **Figure S6:** Results from the Monte Carlo travel time inversion: Distribution of Vp errors for the  
84 three profiles (lines as indicated). Red colors indicate regions of large Vp uncertainties (errors) in  
85 which no reliable velocities could be recovered because of poor or no ray coverage. These regions  
86 are clipped in the velocity models (Figure 2 of main document and Figures S3 – S5).

87 **Figure S7:** Synthetic recovery test. Bottom: Synthetic input model resembling the subducting plate,  
88 the backstop region (distances larger than 120 km) and some undulating high and low velocity  
89 anomalies within the forearc wedge. For this model all travel-times were calculated with a FD  
90 Eikonal solver using the same source and receiver geometry and travel time noise was added.  
91 Unresolved regions of the model are clipped (gray). Middle: Recovered structures revealed by the  
92 tomographic inversion of the synthetic travel time data. Top: Difference between synthetic and  
93 recovered model in percent. Note that the difference is below 5 % in the central part of the model  
94 indicating excellent recovery, increasing to values above 5 % for deeper parts and structures  
95 >140 km distance.

96

## 97 REFERENCES

98 Bauer, K., Ryberg, T., Fuis, G. S., and Lüth, S., 2013, Seismic imaging of the Waltham Canyon  
99 Fault, California: Comparison of Ray-Theoretical and Fresnel Volume Prestack Depth  
100 Migration, Bulletin of the Seismological Society of America, v. 103, no. 1, p. 340–352,  
101 doi:10.1785/0120110338.

102 Bodin, T. & Sambridge, M., 2009, Seismic tomography with the reversible jump algorithm.  
103 Geophysical Journal International, 178: 1411–1436. doi:10.1111/j.1365-246X.2009.04226.x

104 Bodin, T. , Sambridge, M., Rawlinson, N. & Arroucau, P., 2012, Transdimensional tomography with  
105 unknown data noise. *Geophysical Journal International*, 189: 1536–1556. doi:10.1111/j.1365-  
106 246X.2012.05414.x.

107 Haberland, C., Mokhtari, M, Ali Babaei, H, Ryberg, T., Masoodi, M., Partabian, A., & Lauterjung, J  
108 (2020): Data of the Western Makran Seismic Transects (Iran). GFZ Data Services.  
109 <http://doi.org/10.5880/GIPP.201718.1>

110 Kopp, C., Fruehn, J., Flueh, E.R., Reichert, C., Kukowski, N., Bialas, J., Klaeschen, D., 2000,  
111 Structure of the Makran subduction zone from wide-angle and reflection seismic data.  
112 *Tectonophysics* 329, 171-191

113 Ryberg, T. & Haberland, C., 2018, Bayesian inversion of refraction seismic travelttime data, *GJI*,  
114 doi: 10.1093/gji/ggx500.

115 Zelt, C. A., and P. J. Barton 1998, Three-dimensional seismic refraction tomography: A comparison  
116 of two methods applied to data from the Faeroe Basin, *J. Geophys. Res.*, 103(B4), 7187–7210

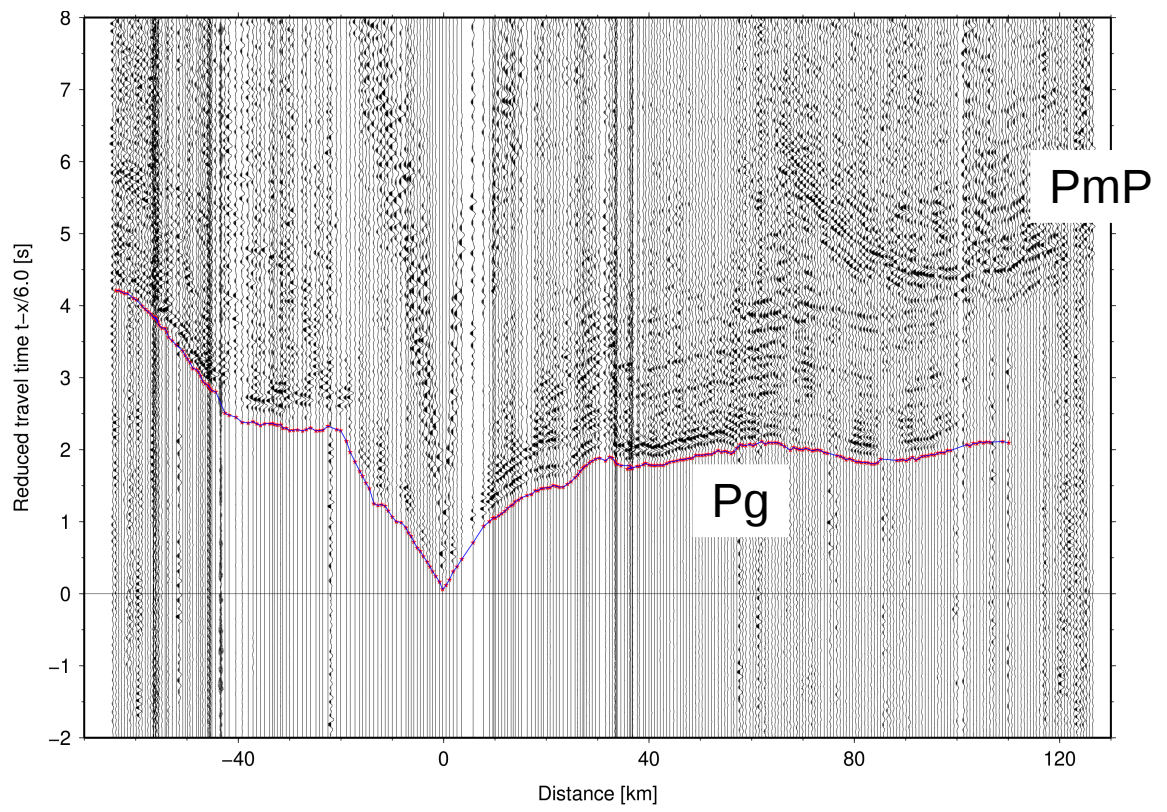

Figure S1

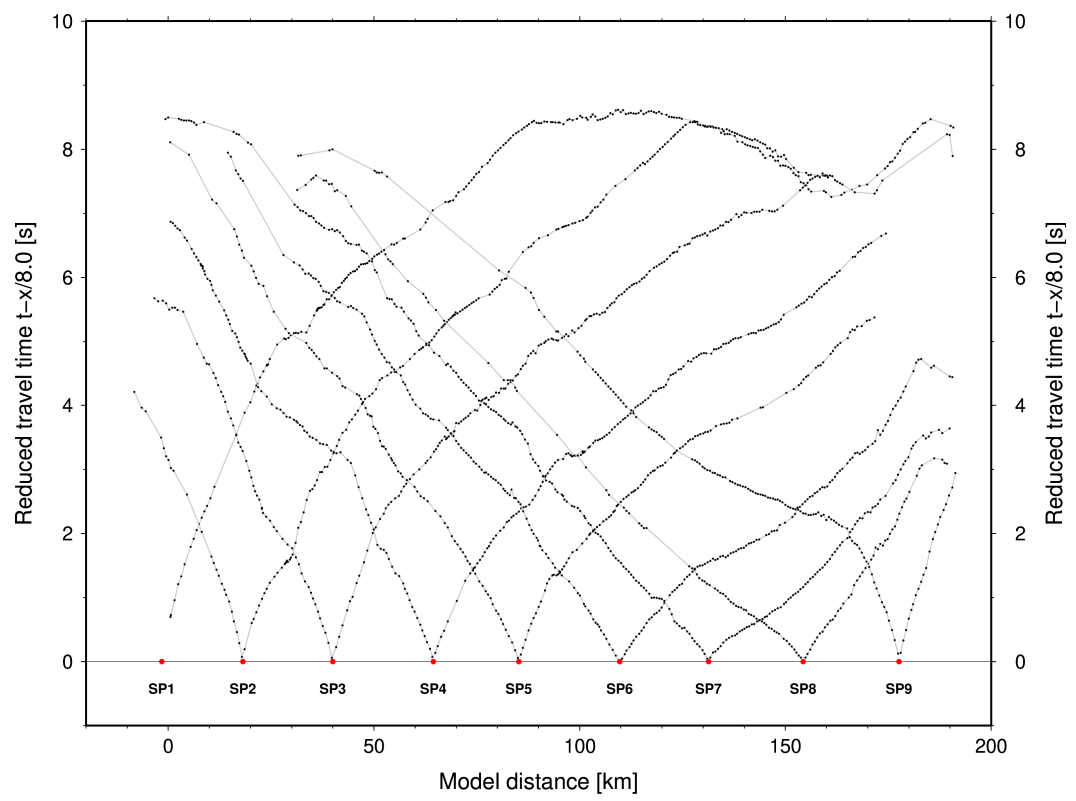

Figure S2

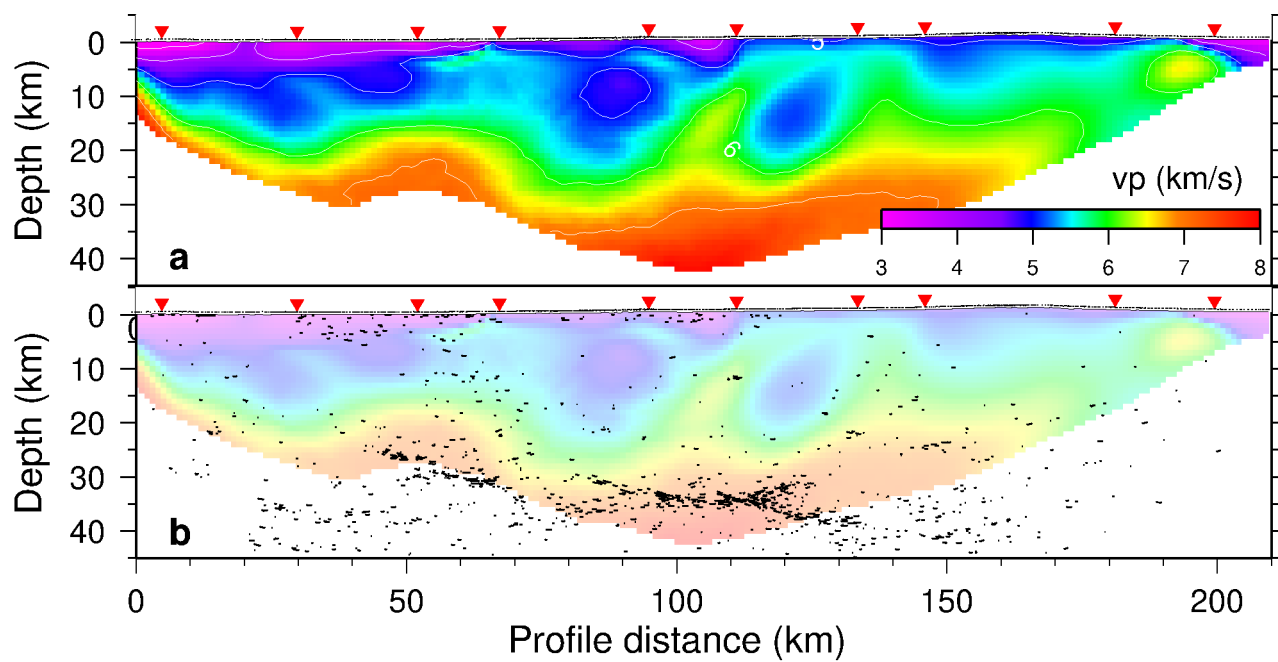

Figure S3



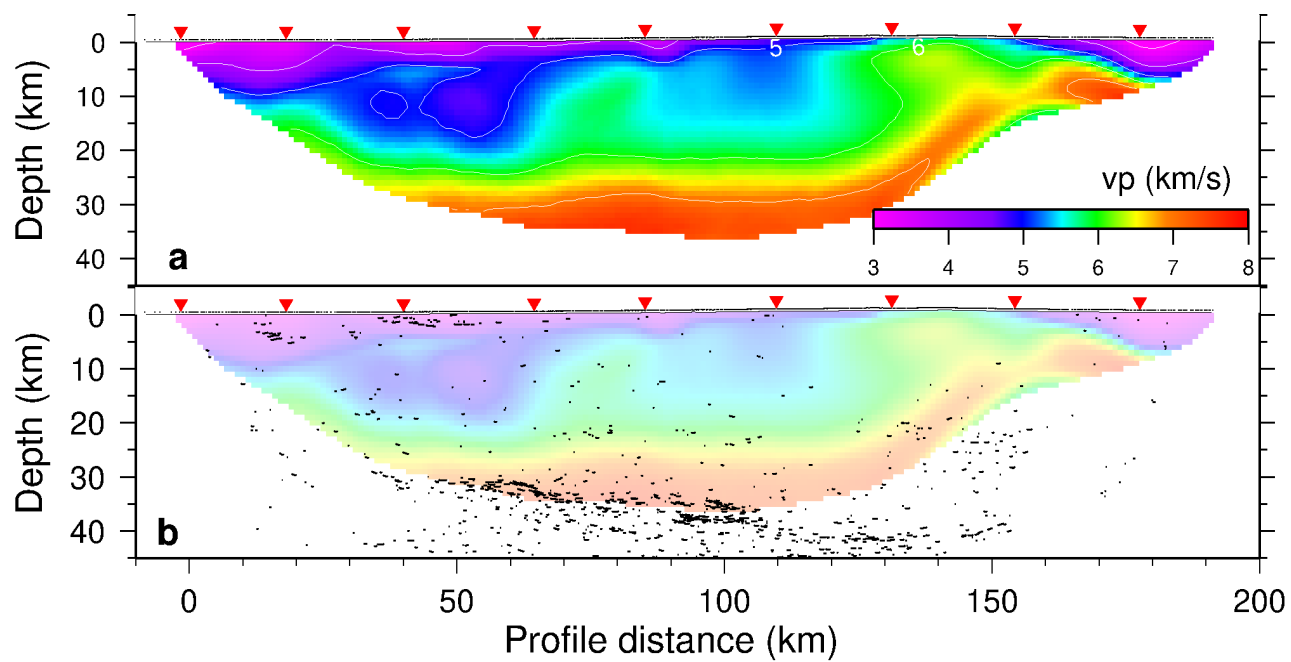

Figure S4

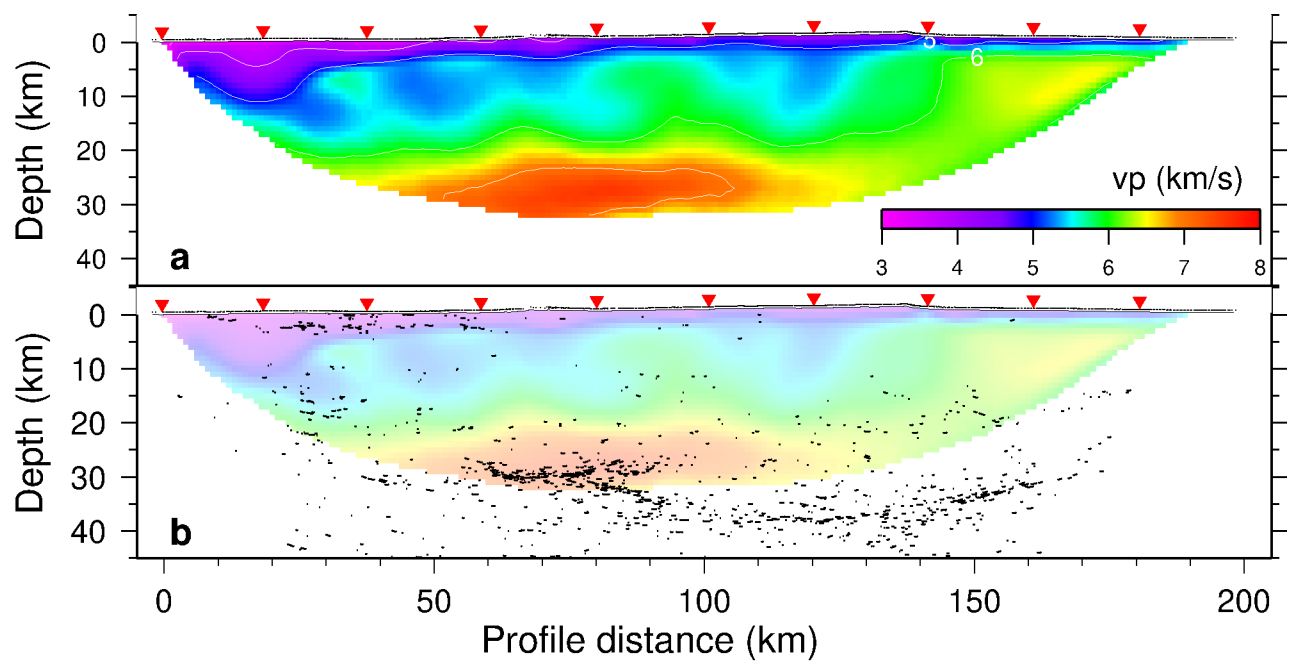

Figure S5

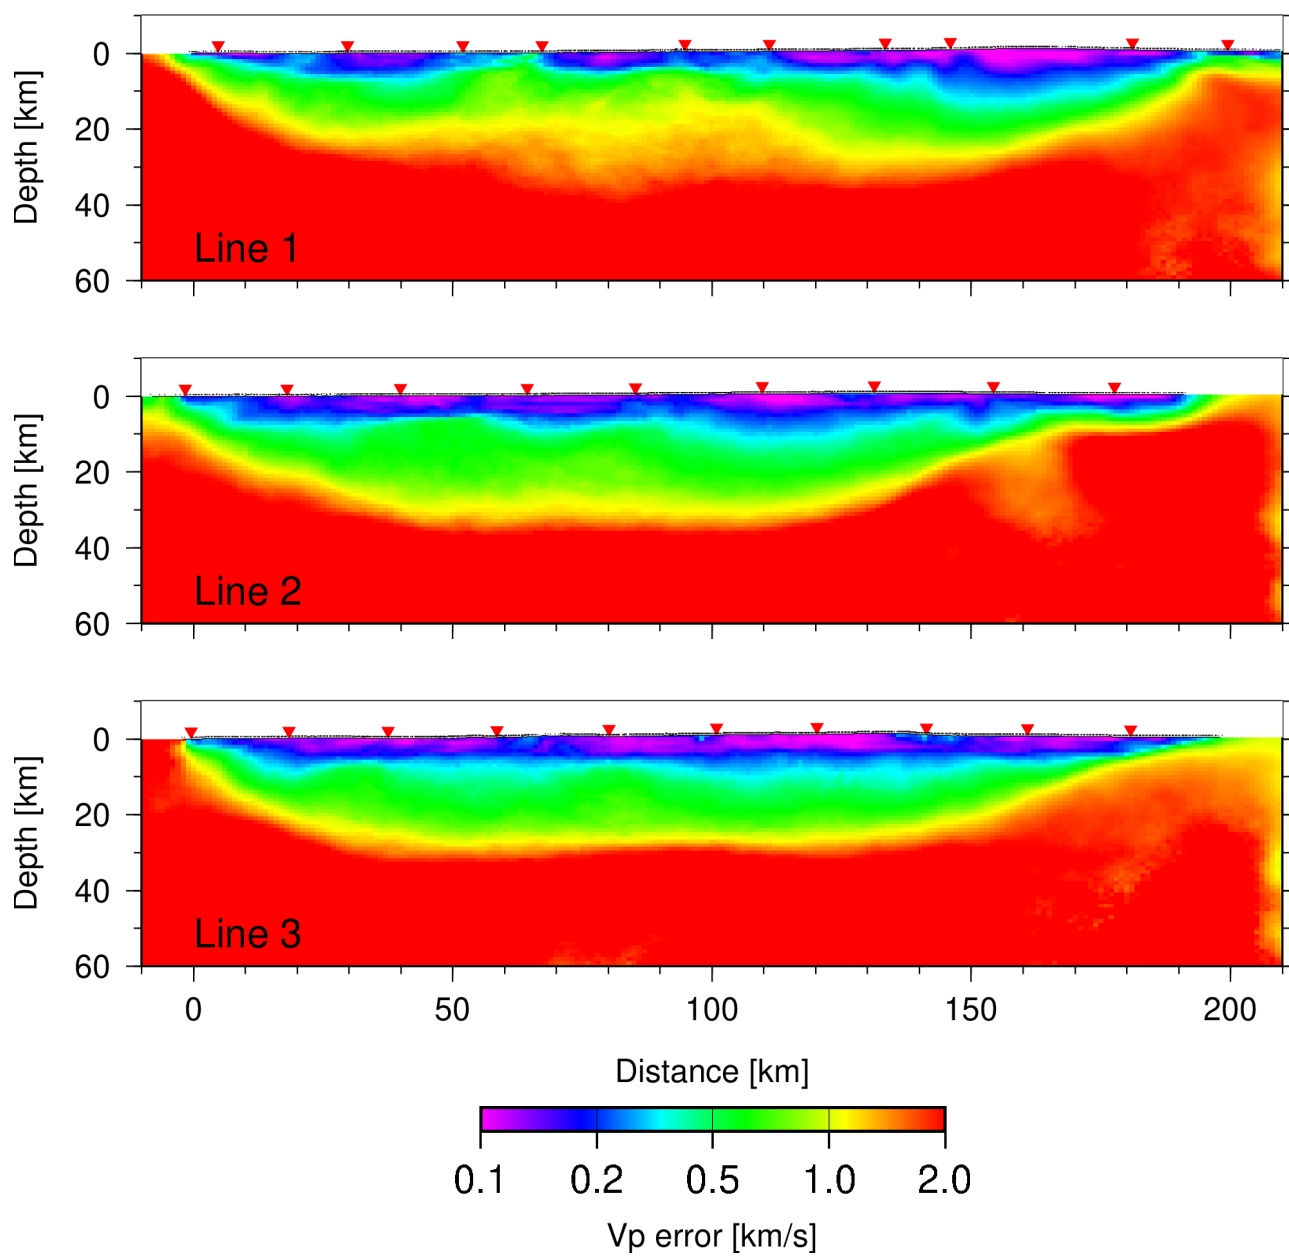

Figure S6

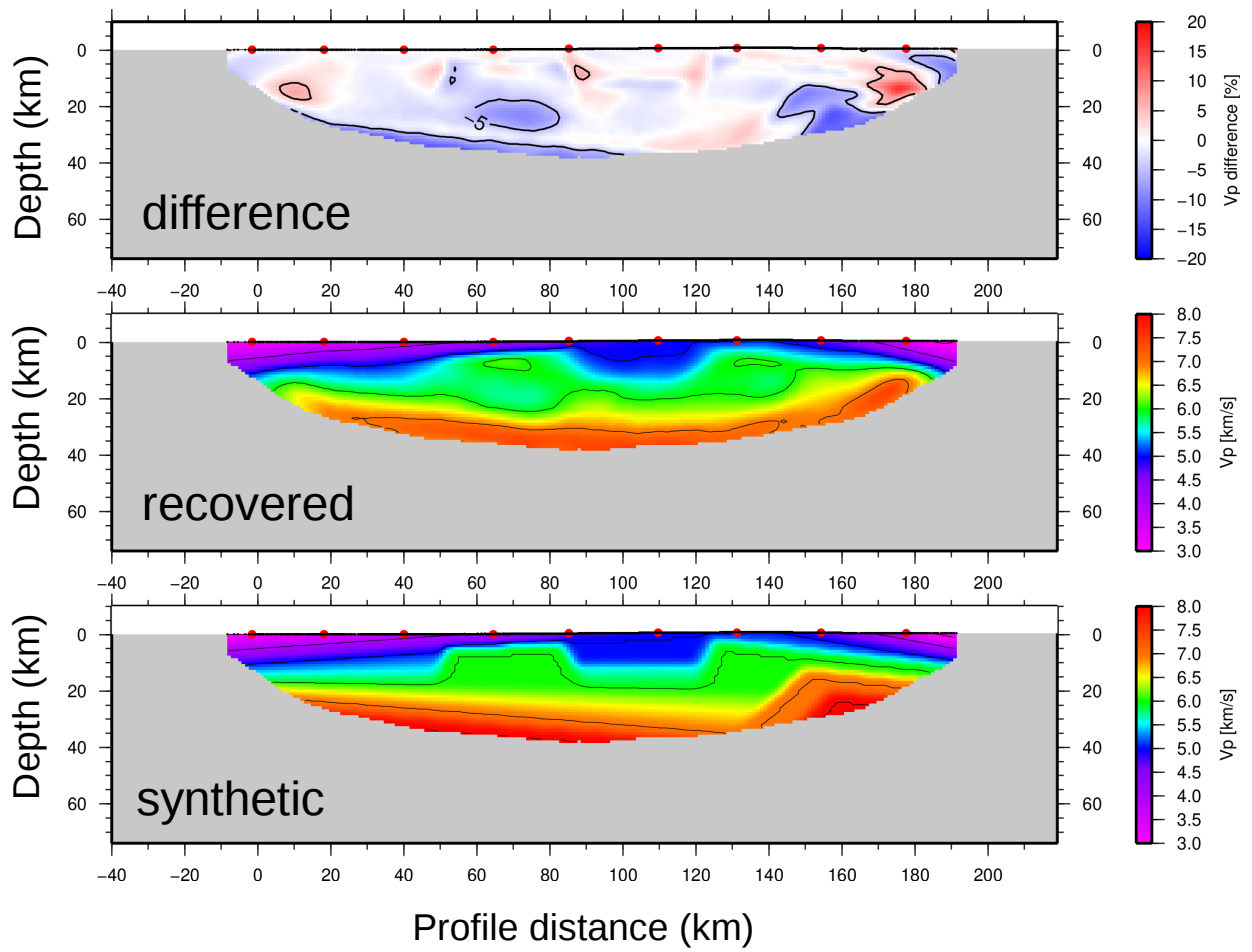

Figure S7
